# Supplementary material
Source: JCI journal article supplement (doi:10.1172/jci87001)

# Supplementary figure 2

## A

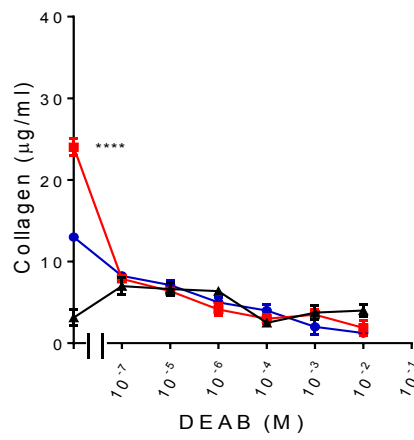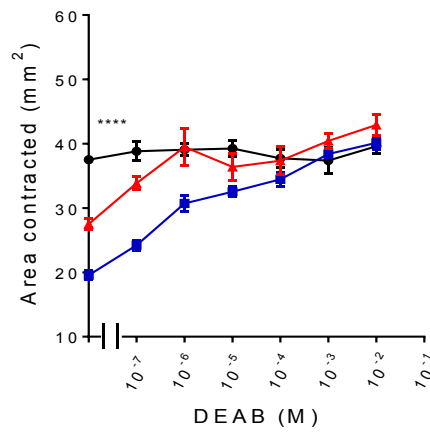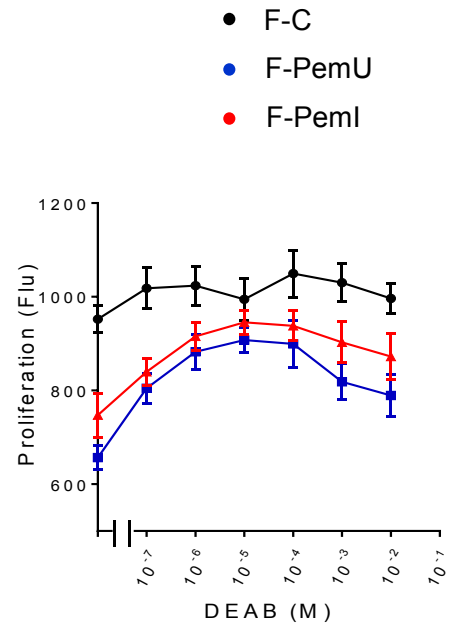

## B

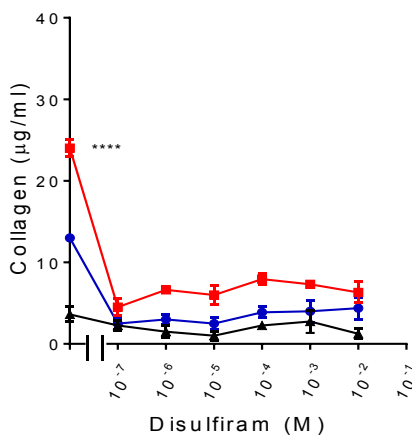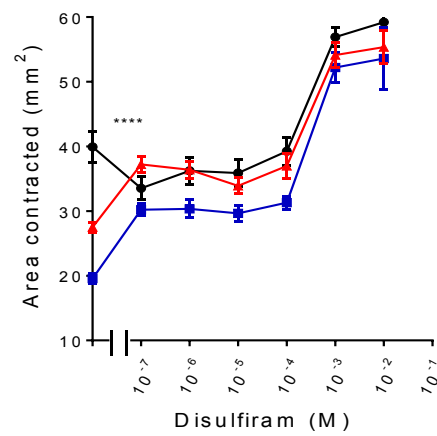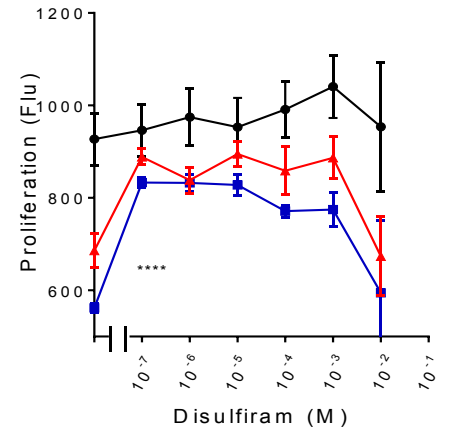

## C

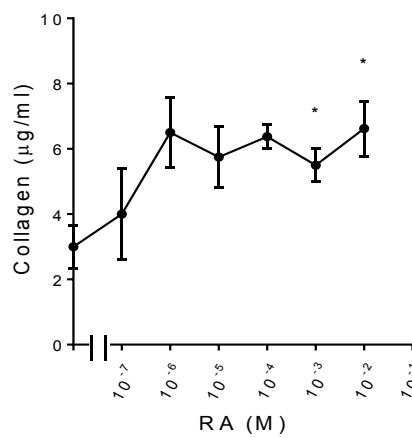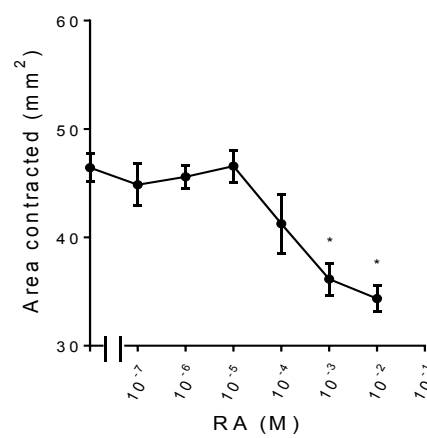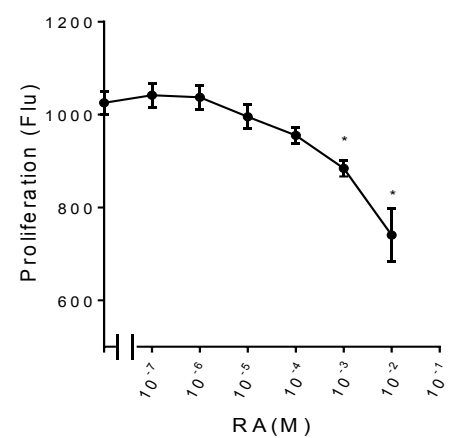

A

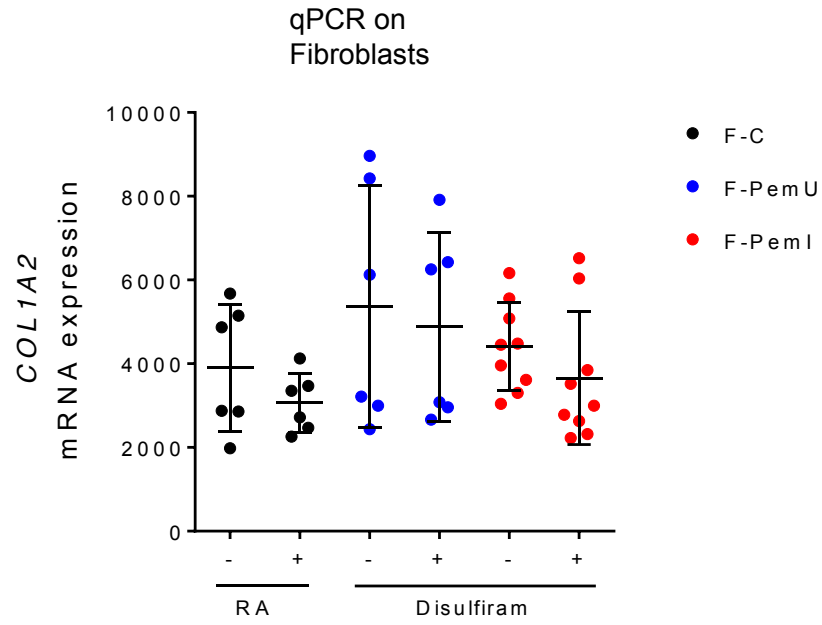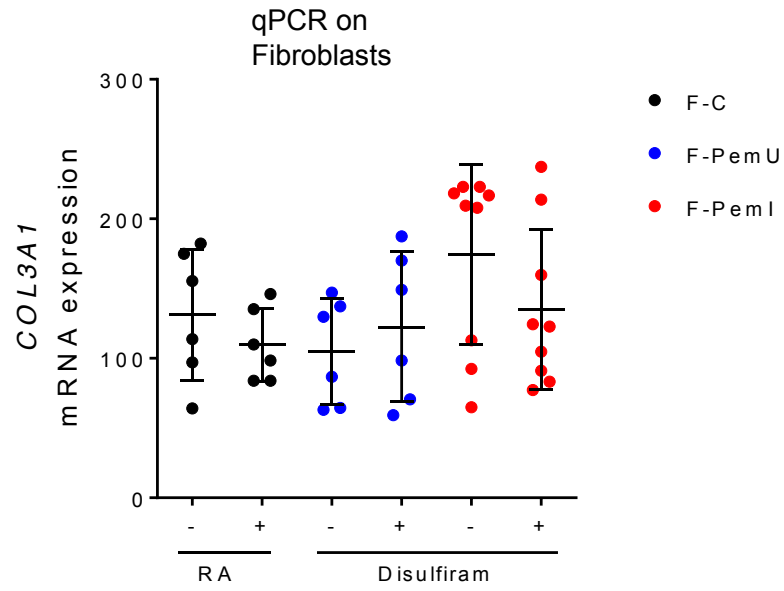

B

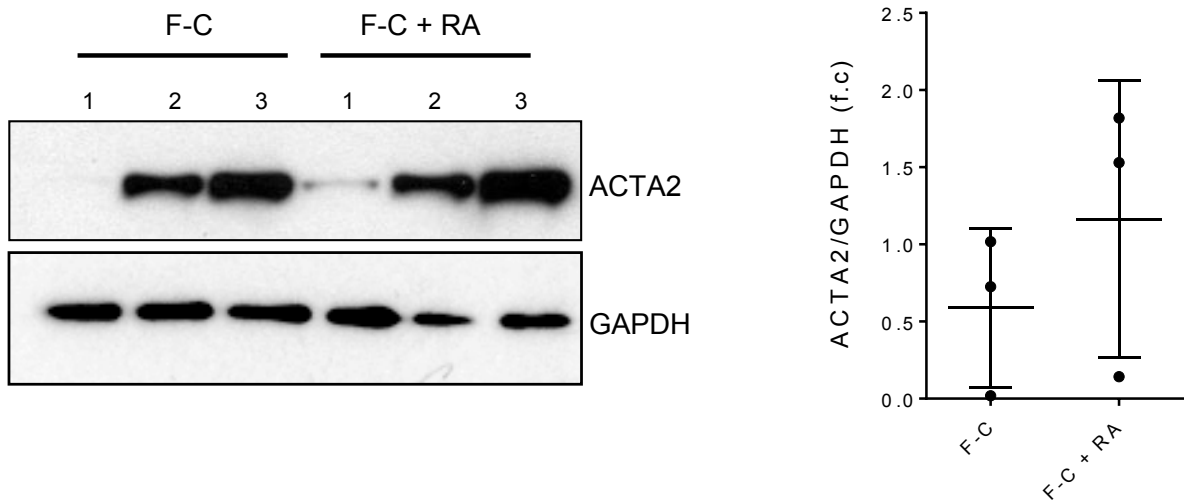

Supplement: sd1 [file 1]
